# Supplementary material for: Chemical bonding misnomer in AeF− (Ae = Be–Ca) anions
Source: Royal Society of Chemistry journal article supplement (doi:10.1039/d4cp01778a), 2024-01-01
Supplement: d4cp01778a1.pdf [file d4cp01778a1.pdf]

Supporting Information

Of

**Chemical Bonding Misnomer in  $AeF^-$  ( $Ae = Be-Ca$ ) Anions**

Ankur K. Guha\*

*Advanced Computational Chemistry Centre, Cotton University, Panbazar, Guwahati, Assam,  
INDIA-781001*

\*Email: [ankurkantiguha@gmail.com](mailto:ankurkantiguha@gmail.com)

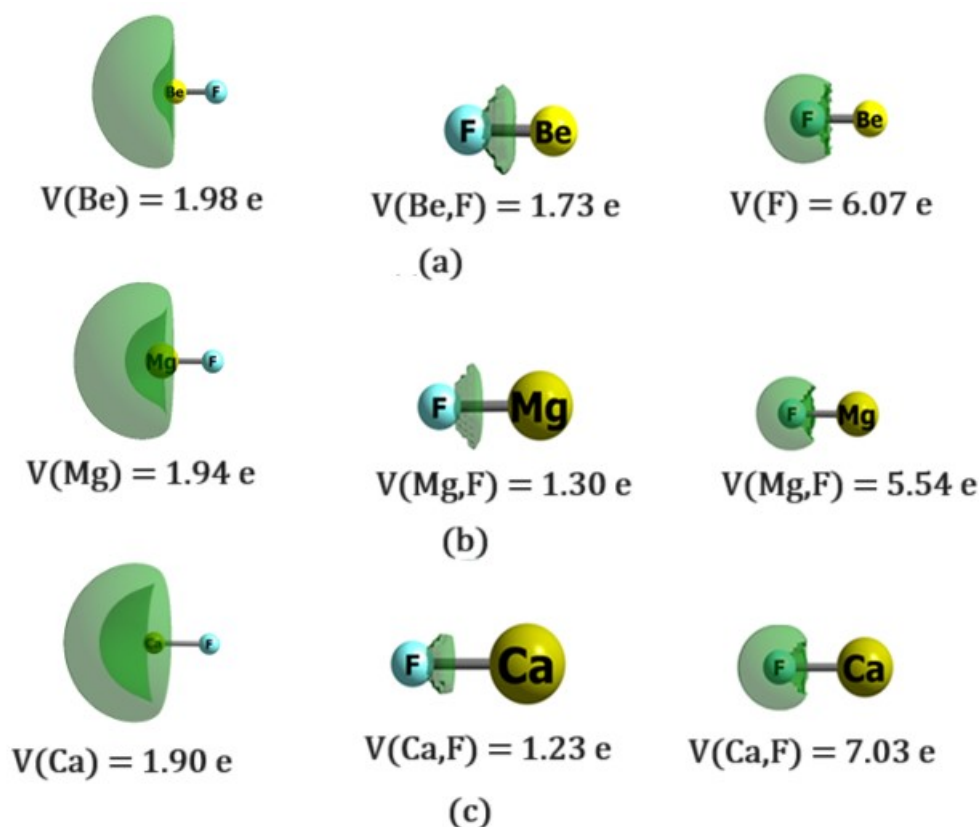

**Fig S1.** ELF basin iso-surface of (a)  $\text{BeF}^-$ , (b)  $\text{MgF}^-$  and (c)  $\text{CaF}^-$  molecules calculated at HF/def2-QZVPP level. Populations of the basins are in electrons (e). ELF plots were prepared using  $\eta = 0.62 \text{ a.u.}$

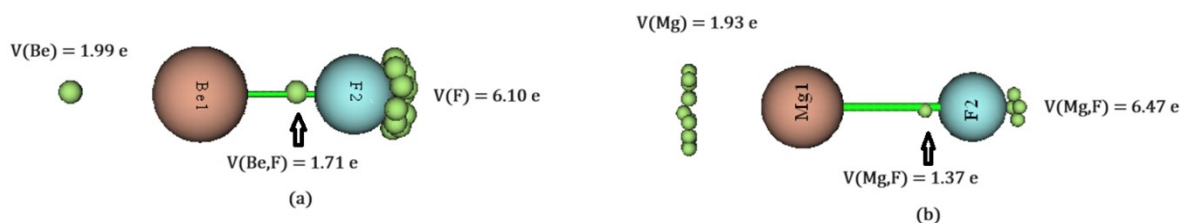

**Fig S2.** ELF basin populations (in e) and location of attractors for (a)  $\text{BeF}^-$  and (b)  $\text{MgF}^-$  molecules calculated at CCSD(T)(Full)/def2-QZVPP level.

Cartesian coordinates of the molecules calculated at CCSD(T)(Full)/def2-QZVPP level along with the total (SCF) energies (a. u).

### $\text{BeF}^-$

SCF = -114.58128

Be 0.000000000 0.000000000 -0.989691000

F 0.000000000 0.000000000 0.439863000

### $\text{MgF}^-$

SCF = -299.762834

Mg 0.000000000 0.000000000 0.788573000

F 0.000000000 0.000000000 -1.051431000

**CaF**

SCF = -776.99116

Ca 0.000000000 0.000000000 0.653230000

F 0.000000000 0.000000000 -1.451621000
